# Supplementary material
Source: publisher figshare collection journal article supplement (https://frontiersin.figshare.com/ndownloader/files/22430520)
Supplement: Supplementary file [file 22430520]

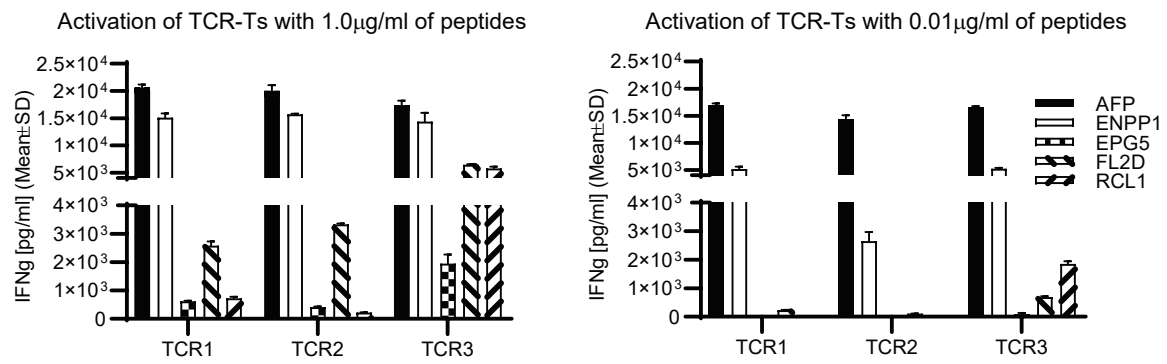

Fig S3. IFNγ production (absolute amount) by TCR-Ts after stimulation with high and low concentration of off-target peptides.
